# Supplementary material for: The exosome-like vesicles from osteoarthritic chondrocyte enhanced mature IL-1β production of macrophages and aggravated synovitis in osteoarthritis
Source: PubMed Central journal article supplement (PMC6614358; doi:10.1038/s41419-019-1739-2), 2019-07-08

# Figure S1

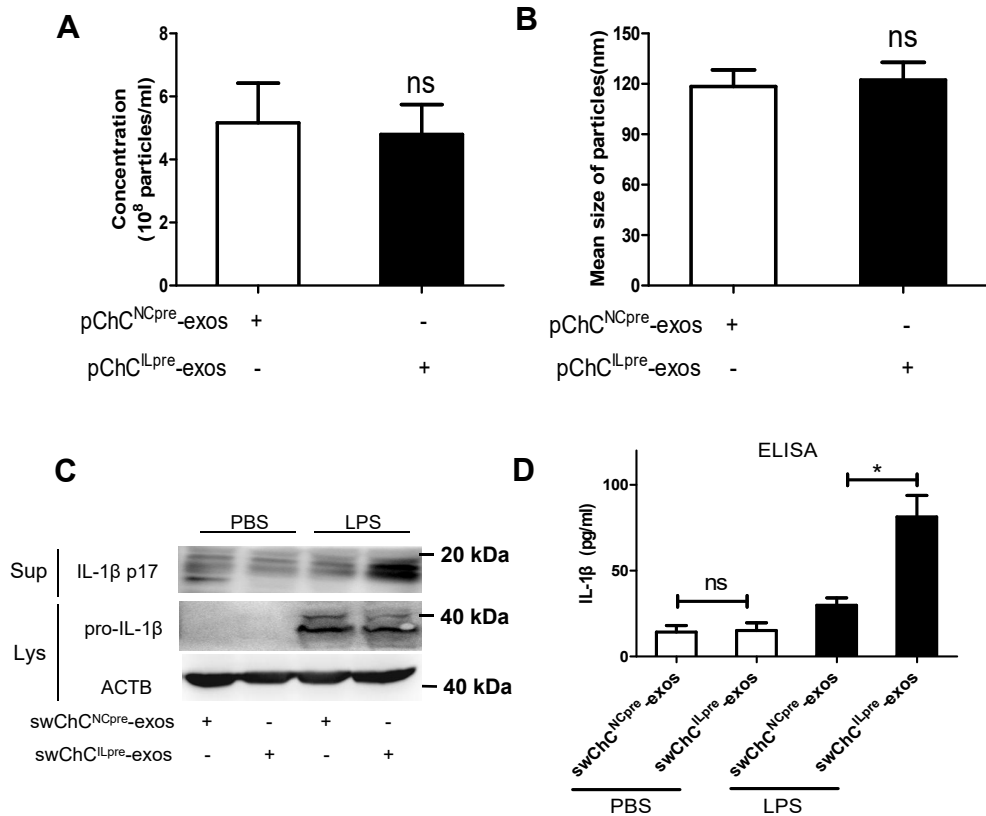

**Figure S2**

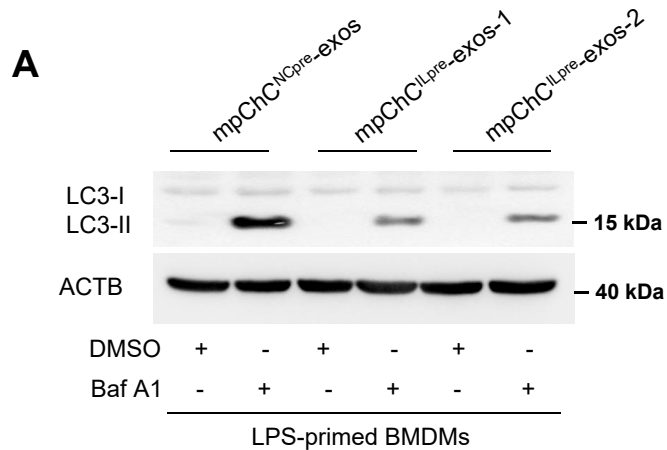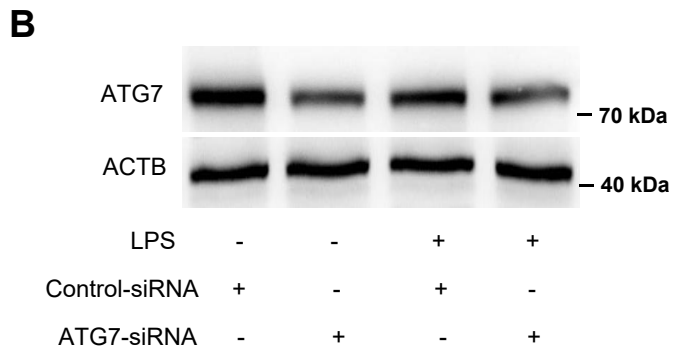

# Figure S3

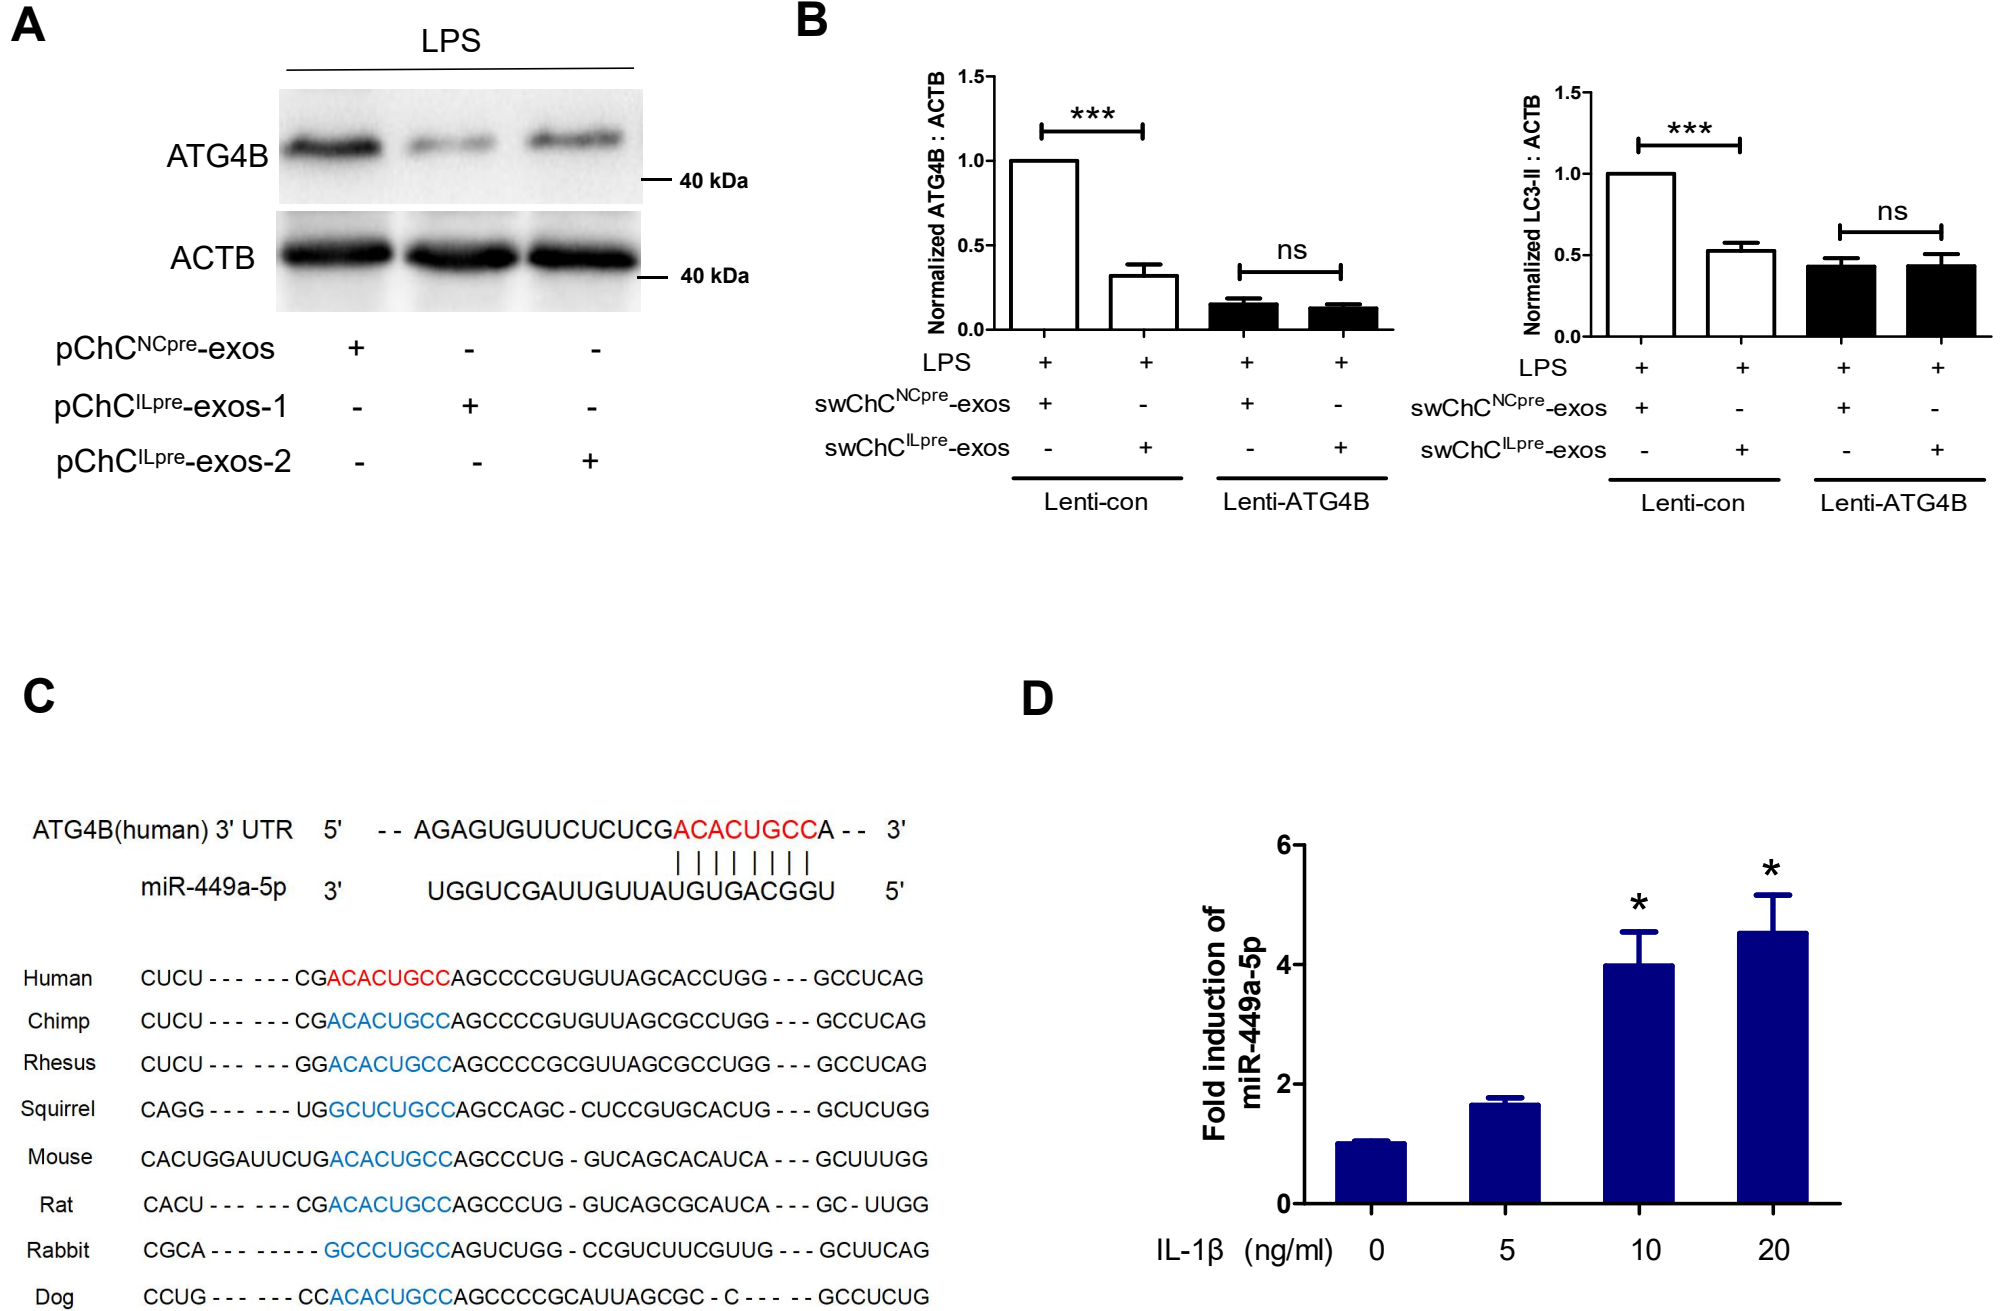

Supplement: 41419_2019_1739_MOESM2_ESM.pdf [file 41419_2019_1739_MOESM2_ESM.pdf]
